# Supplementary material for: LaAeAl3S7(Ae = Ca, Sr): Cairo pentagonal layered thioaluminates achieving a good balance between a strong second harmonic generation response and a wide bandgap
Source: Royal Society of Chemistry journal article supplement (doi:10.1039/d3qi00048f), 2023-01-01
Supplement: d3qi00048f1.pdf [file d3qi00048f1.pdf]

## ESI

# **LaAeAl<sub>3</sub>S<sub>7</sub> (Ae = Ca, Sr): Cairo Pentagonal Layered thioaluminates Achieving Well-balance between Strong Second Harmonic Generation Response and Wide Bandgap**

Jingjing Xu,<sup>b</sup> Kui Wu,<sup>a,\*</sup> Bingbing Zhang,<sup>b</sup> Haohai Yu,<sup>a,\*</sup> Huaijin Zhang<sup>a,\*</sup>

<sup>a</sup> State Key Laboratory of Crystal Materials and Institute of Crystal Materials,  
Shandong University, Jinan, China

<sup>b</sup> College of Chemistry and Environmental Science, Hebei University, Baoding, China

E-mail: wukui@sdu.edu.cn; haohaiyu@sdu.edu.cn; huaijinzhang@sdu.edu.cn;

## **CONTENTS**

1. Tables
2. Figures
3. References

## 1. Tables

**Table S1.** Dimensional distribution of  $\text{AlS}_4$  units in the known thioaluminates.

**Table S2.** Comparison of the SHG effects and band gaps among  $\text{LaAeAl}_3\text{S}_7$  and other reported NLO rare-earth chalcogenides.

**Table S3.** Crystal data and structure refinement for  $\text{LaAeAl}_3\text{S}_7$ .

**Table S4.** Comparison of the distortion degrees ( $\Delta d/\%$ ) of  $\text{AeS}_8/(\text{La/Ae})\text{S}_8$  units among  $\text{LaAeAl}_3\text{S}_7$  and  $\text{AeAl}_2\text{S}_4$ .

**Table S1.** Dimensional distribution of  $\text{AlS}_4$  units in the known thioaluminates.

| Compound                                                                                 | Space group     | Unit           | Dimensionality |
|------------------------------------------------------------------------------------------|-----------------|----------------|----------------|
| $(\text{Ag}_{0.8}\text{Cu}_{3.2})\text{Al}_4\text{S}_8$                                  | <i>I-42d</i>    | $\text{AlS}_4$ | 3D             |
| $(\text{Ag}_{3.6}\text{Cu}_{0.4})\text{Al}_4\text{S}_8$                                  | <i>I-42d</i>    | $\text{AlS}_4$ | 3D             |
| $\text{Ln}_3\text{AlMS}_7$ (Ln=Y, Lanthanide series;<br>M=Fe, Co, Ni, Zn, Mn, Cr, V, Ti) | <i>P6_3</i>     | $\text{AlS}_4$ | 0D             |
| $\text{Ba}_2\text{AlSbS}_5$                                                              | <i>Pnma</i>     | $\text{AlS}_4$ | 0D             |
| $\text{LiBa}_2\text{AlS}_4$                                                              | <i>P2_1/m</i>   | $\text{AlS}_4$ | 0D             |
| $\text{Na}_{0.80}\text{Ba}_{0.80}(\text{AlS}_3)_{0.80}$                                  | <i>Pnma</i>     | $\text{AlS}_4$ | 0D             |
| $(\text{Al}_{0.973}\text{Li}_{3.126})\text{S}_3$                                         | <i>C2/c</i>     | $\text{AlS}_4$ | 0D             |
| $\text{Al}(\text{V}_4\text{S}_8)$                                                        | <i>F-43m</i>    | $\text{AlS}_4$ | 0D             |
| $\text{Ag}_9\text{AlS}_6$                                                                | <i>F-43m</i>    | $\text{AlS}_4$ | 0D             |
| $\text{Al}_{0.55}\text{Mo}_2\text{S}_4$                                                  | <i>F-43m</i>    | $\text{AlS}_4$ | 0D             |
| $\text{AlMo}_4\text{S}_8$                                                                | <i>F-43m</i>    | $\text{AlS}_4$ | 0D             |
| $\text{Al}_{0.75}\text{Mo}_2\text{S}_4$                                                  | <i>F-43m</i>    | $\text{AlS}_4$ | 0D             |
| $\text{Al}(\text{PS}_4)$                                                                 | <i>I222</i>     | $\text{AlS}_4$ | 0D             |
| $\text{AlMo}_4\text{S}_8$                                                                | <i>R3mR</i>     | $\text{AlS}_4$ | 0D             |
| $\text{Na}_5(\text{AlS}_4)$                                                              | <i>Pbca</i>     | $\text{AlS}_4$ | 0D             |
| $\text{TaS}_2\text{Al}_{0.33}$                                                           | <i>P6_3/mmc</i> | $\text{AlS}_4$ | 0D             |
| $\text{Na}_3\text{AlS}_3$                                                                | <i>P2_1/n</i>   | $\text{AlS}_4$ | 0D             |
| $\text{AlLi}_5\text{S}_4$                                                                | <i>P2_1/m</i>   | $\text{AlS}_4$ | 0D             |
| $\text{Na}_6\text{Al}_2\text{S}_6$                                                       | <i>P2_1/c</i>   | $\text{AlS}_4$ | 0D             |
| $\text{Rb}_4(\text{Al}_2\text{S}_5)$                                                     | <i>Pna2_1</i>   | $\text{AlS}_4$ | 1D             |
| $\text{MAl}_2\text{S}_4$ (M=Eu, Pb, Sr)                                                  | <i>Cccm</i>     | $\text{AlS}_4$ | 1D             |
| $\text{Bi}_2(\text{Al}_4\text{S}_8)$                                                     | <i>P4/nncZ</i>  | $\text{AlS}_4$ | 1D             |
| $\text{TlAlS}_2$                                                                         | <i>C2/c</i>     | $\text{AlS}_4$ | 2D             |

|                                                                             |                   |                                     |                                             |
|-----------------------------------------------------------------------------|-------------------|-------------------------------------|---------------------------------------------|
| ZnAl <sub>2</sub> S <sub>4</sub>                                            | Pna2 <sub>1</sub> | AlS <sub>4</sub>                    | 2D                                          |
| FeAl <sub>2</sub> S <sub>4</sub>                                            | R3mH              | AlS <sub>4</sub>                    | 2D                                          |
| MnAl <sub>2</sub> S <sub>4</sub>                                            | R3mH              | AlS <sub>4</sub>                    | 2D                                          |
| AeAl <sub>2</sub> S <sub>4</sub> (Ae=Ca, Sr)                                | Fddd              | AlS <sub>4</sub>                    | 2D                                          |
| Tl <sub>3</sub> Al <sub>13</sub> S <sub>21</sub>                            | C1m1              | AlS <sub>4</sub>                    | 3D                                          |
| CuAlS <sub>2</sub>                                                          | I-42d             | AlS <sub>4</sub>                    | 3D                                          |
| CdAl <sub>2</sub> S <sub>4</sub>                                            | I-4               | AlS <sub>4</sub>                    | 3D                                          |
| HgAl <sub>2</sub> S <sub>4</sub>                                            | I-4               | AlS <sub>4</sub>                    | 3D                                          |
| Tl <sub>3</sub> (Al <sub>7</sub> S <sub>12</sub> )                          | P2 <sub>1</sub>   | AlS <sub>4</sub>                    | 3D                                          |
| AlInS <sub>3</sub>                                                          | P6 <sub>1</sub>   | AlS <sub>4</sub>                    | 3D                                          |
| BaAl <sub>4</sub> S <sub>7</sub>                                            | Pmn2 <sub>1</sub> | AlS <sub>4</sub>                    | 3D                                          |
| Ln <sub>6</sub> Al <sub>3.3</sub> S <sub>14</sub> (Ln=Y, Lanthanide series) | P6 <sub>3</sub>   | AlS <sub>6</sub> ; AlS <sub>4</sub> | AlS <sub>6</sub> 1D;<br>AlS <sub>4</sub> 0D |

**Table S2.** Comparison of the SHG effect and band gap among LaAeAl<sub>3</sub>S<sub>7</sub> and other reported NLO rare-earth chalcogenides.

| Number | Compound                                                        | E <sub>g</sub> (eV) | SHG<br>(×AgGaS <sub>2</sub> ) | References |
|--------|-----------------------------------------------------------------|---------------------|-------------------------------|------------|
| 1      | La <sub>2</sub> CuSbS <sub>5</sub>                              | 2.06                | 0.5                           | S1         |
| 2      | Sm <sub>4</sub> InSbS <sub>9</sub>                              | 2.13                | 0.75                          | S2         |
| 3      | ZnY <sub>8</sub> Si <sub>2</sub> S <sub>14</sub>                | 2.38                | 0.84                          | S3         |
| 4      | Gd <sub>4</sub> GaSbS <sub>9</sub>                              | 2.41                | 0.8                           | S2         |
| 5      | Dy <sub>3</sub> GaS <sub>6</sub>                                | 2.81                | 0.084                         | S4         |
| 6      | Y <sub>3</sub> GaS <sub>6</sub>                                 | 2.88                | 0.21                          | S4         |
| 7      | La <sub>3</sub> LiGeS <sub>7</sub>                              | 3.02                | 0.7                           | S5         |
| 8      | KYGeS <sub>4</sub>                                              | 3.15                | 1                             | S6         |
| 9      | La <sub>4</sub> InSbS <sub>9</sub>                              | 2.07                | 1.5                           | S7         |
| 10     | EuHgSnS <sub>4</sub>                                            | 2.14                | 1.77                          | S8         |
| 11     | La <sub>8</sub> Sb <sub>2</sub> S <sub>15</sub>                 | 2.3                 | 1.2                           | S9         |
| 12     | La <sub>3</sub> LiSnS <sub>7</sub>                              | 2.4                 | 1.2                           | S5         |
| 13     | La <sub>6</sub> In <sub>2</sub> GeS <sub>14</sub>               | 2.61                | 1.8                           | S10        |
| 14     | Ba <sub>4</sub> Sm <sub>2</sub> Cd <sub>3</sub> S <sub>10</sub> | 2.77                | 1.8                           | S11        |
| 15     | LiSm <sub>3</sub> SiS <sub>7</sub>                              | 2.83                | 1.5                           | S5         |
| 16     | LaSrGa <sub>3</sub> S <sub>7</sub>                              | 2.92                | 1.3                           | S12        |
| 17     | LaCaGa <sub>3</sub> S <sub>7</sub>                              | 2.96                | 1.3                           | S12        |
| 18     | EuCdGeS <sub>4</sub>                                            | 2.5                 | 2.6                           | S13        |
| 19     | Sm <sub>4</sub> GaSbS <sub>9</sub>                              | 2.23                | 3.8                           | S14        |
| 20     | La <sub>6</sub> Ga <sub>2</sub> GeS <sub>14</sub>               | 2.54                | 4.8                           | S10        |

|    |                                        |             |            |                  |
|----|----------------------------------------|-------------|------------|------------------|
| 21 | CsLaGeS <sub>4</sub>                   | 3.6         | 0.18       | S15              |
| 22 | <b>LaCaAl<sub>3</sub>S<sub>7</sub></b> | <b>3.76</b> | <b>0.8</b> | <b>this work</b> |
| 23 | <b>LaSrAl<sub>3</sub>S<sub>7</sub></b> | <b>3.78</b> | <b>1.1</b> | <b>this work</b> |

**Table S3.** Crystal data and structure refinement for LaAeAl<sub>3</sub>S<sub>7</sub>.

| Empirical formula                                                     | LaCaAl <sub>3</sub> S <sub>7</sub> | LaSrAl <sub>3</sub> S <sub>7</sub> |
|-----------------------------------------------------------------------|------------------------------------|------------------------------------|
| Formula weight                                                        | 484.35                             | 531.89                             |
| crystal system                                                        | <i>Tetragonal</i>                  |                                    |
| space group                                                           | <i>P-42<sub>1</sub>m</i>           |                                    |
| <i>a</i> (Å)                                                          | 9.4861(16)                         | 9.5854(16)                         |
| <i>c</i> (Å)                                                          | 6.1824(13)                         | 6.2319(18)                         |
| <i>Z</i> , <i>V</i> (Å <sup>3</sup> )                                 | 2, 556.3(2)                        | 2, 572.6(3)                        |
| <i>D<sub>c</sub></i> (g/cm <sup>3</sup> )                             | 2.891                              | 3.085                              |
| <i>μ</i> (mm <sup>-1</sup> )                                          | 5.788                              | 9.784                              |
| GOF on F <sup>2</sup>                                                 | 1.063                              | 1.059                              |
| <i>R</i> <sub>1</sub> , <i>wR</i> <sub>2</sub> (I>2σ(I)) <sup>a</sup> | 0.0399, 0.0941                     | 0.0202, 0.0369                     |
| <i>R</i> <sub>1</sub> , <i>wR</i> <sub>2</sub> (all data)             | 0.0442, 0.0968                     | 0.0234, 0.0375                     |
| <i>Flack parameter</i>                                                | -0.04(3)                           | 0.039(14)                          |
| Largest diff. peak and hole (e Å <sup>-3</sup> )                      | 1.463, -1.009                      | 0.672, -0.320                      |

**Table S4.** Comparison on the distortion degrees ( $\Delta d/\%$ ) of AeS<sub>8</sub>/(La/Ae)S<sub>8</sub> units among LaAeAl<sub>3</sub>S<sub>7</sub> and AeAl<sub>2</sub>S<sub>4</sub>.

| Compound                                         | (La/Ae)S <sub>8</sub> /AeS <sub>8</sub> | (La/Ae)S <sub>8</sub> /AeS <sub>8</sub> ( $\Delta d/\%$ ) |
|--------------------------------------------------|-----------------------------------------|-----------------------------------------------------------|
| LaCaAl <sub>3</sub> S <sub>7</sub>               | (La/Ca)S <sub>8</sub>                   | 2.763                                                     |
| LaSrAl <sub>3</sub> S <sub>7</sub>               | (La/Sr)S <sub>8</sub>                   | 3.062                                                     |
| CaAl <sub>2</sub> S <sub>4</sub> ( <i>Fddd</i> ) | Ca1S <sub>8</sub>                       | 0.0007                                                    |
|                                                  | Ca2S <sub>8</sub>                       | 0.0024                                                    |
|                                                  | Ca3S <sub>8</sub>                       | 0.140                                                     |
|                                                  | Sr1S <sub>8</sub>                       | 0.030                                                     |
| SrAl <sub>2</sub> S <sub>4</sub> ( <i>Fddd</i> ) | Sr2S <sub>8</sub>                       | 0.071                                                     |
|                                                  | Sr3S <sub>8</sub>                       | 0.092                                                     |
| SrAl <sub>2</sub> S <sub>4</sub> ( <i>Cccm</i> ) | SrS <sub>8</sub>                        | 0.0073                                                    |

## 2. Figures

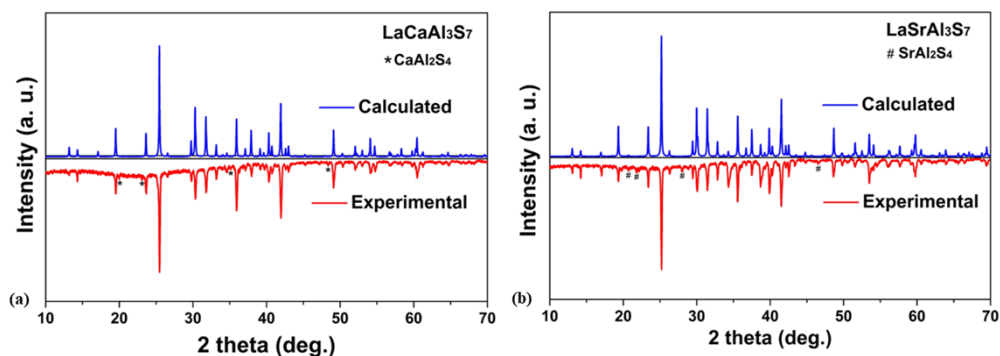

**Fig. S1.** Experimental XRD patterns for (a)  $\text{LaCaAl}_3\text{S}_7$  and (b)  $\text{LaSrAl}_3\text{S}_7$ .

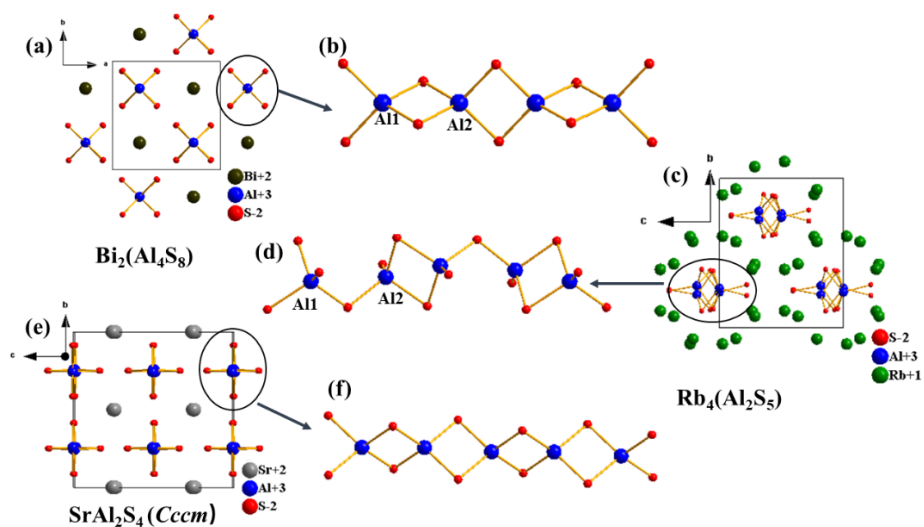

**Fig. S2.** (a) Crystal structure of  $\text{Bi}_2(\text{Al}_4\text{S}_8)$  along the  $c$ -axis; (b) 1D chain is composed of  $\text{AlS}_4$  units in  $\text{Bi}_2(\text{Al}_4\text{S}_8)$ ; (c) Crystal structure of  $\text{Rb}_4(\text{Al}_2\text{S}_5)$  along the  $a$ -axis; (d) 1D chain is composed of  $\text{AlS}_4$  units in  $\text{Rb}_4(\text{Al}_2\text{S}_5)$ ; (e) Crystal structure of  $\text{SrAl}_2\text{S}_4$  along the  $a$ -axis; (f) 1D chain is composed of  $\text{AlS}_4$  units in  $\text{SrAl}_2\text{S}_4$ .

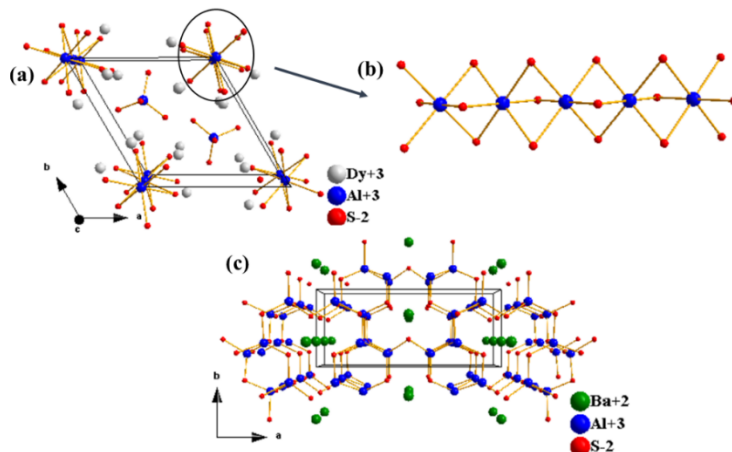

**Fig. S3.** (a) Crystal structure of  $\text{Dy}_6\text{Al}_{3.3}\text{S}_{14}$  along the  $c$ -axis; (b) 1D chain is composed of  $\text{AlS}_6$  units in  $\text{Dy}_6\text{Al}_{3.3}\text{S}_{14}$ ; (c) Crystal structure of  $\text{BaAl}_4\text{S}_7$  along the  $c$ -axis.

## References

- S1. H. Lin, Y. Li, M. Li, Z. Ma, L. Wu, X. Wu and Q. Zhu, Centric-to-acentric structure transformation induced by a stereochemically active lone pair: a new insight for design of IR nonlinear optical materials. *J. Mater. Chem. C*, 2019, **7**, 4638-4643.
- S2. H. Zhao, Synthesis, crystal structure, and NLO property of the chiral sulfide  $\text{Sm}_4\text{InSbS}_9$ . *Z. Anorg. Allg. Chem.*, 2016, **642**, 56-59.
- S3. S.-P. Guo, G.-C. Guo, M.-S. Wang, J.-P. Zou, G. Xu, G.-J. Wang, X.-F. Long and J.-S. Huang, A Series of New Infrared NLO Semiconductors,  $\text{ZnY}_6\text{Si}_2\text{S}_{14}$ ,  $\text{Al}_x\text{Dy}_3(\text{Si}_y\text{Al}_{1-y})\text{S}_7$ , and  $\text{Al}_{0.33}\text{Sm}_3\text{SiS}_7$ , *Inorg. chem.*, 2009, **48**, 7059-7065.
- S4. M. J. Zhang, B. X. Li, B. W. Liu, Y. H. Fan, X. G. Li, H. Y. Zeng and G. C. Guo,  $\text{Ln}_3\text{GaS}_6$  (Ln = Dy, Y): new infrared nonlinear optical materials with high laser induced damage thresholds, *Dalton Trans.*, 2013, **42**, 14223-14229.
- S5. Y. Yang, Y. Chu, B. Zhang, K. Wu and S. Pan, Unique Unilateral-Chelated Mode-Induced d-p- $\pi$  Interaction Enhances Second-Harmonic Generation Response in New  $\text{Ln}_3\text{LiMS}_7$  Family, *Chem. Mater.*, 2021, **33**, 4225-4230.
- S6. D. Mei, W. Cao, N. Wang, X. Jiang, J. Zhao, W. Wang, J. Dang, S. Zhang, Y. Wu, P. Rao and Z. Lin, Breaking through the "3.0 eV wall" of energy band gap in mid-infrared nonlinear optical rare earth chalcogenides by charge-transfer engineering, *Mater. Horiz.*, 2021, **8**, 2330-2334.
- S7. H. J. Zhao, Y. F. Zhang and L. Chen, Strong Kleinman-forbidden second harmonic generation in chiral sulfide:  $\text{La}_4\text{InSbS}_9$ , *J. Am. Chem. Soc.*, 2012, **134**, 1993-1995.
- S8. W. Xing, C. Tang, N. Wang, C. Li, Z. Li, J. Wu, Z. Lin, J. Yao, W. Yin and B. Kang,  $\text{EuHgGeSe}_4$  and  $\text{EuHgSnS}_4$ : Two Quaternary Eu-Based Infrared Nonlinear Optical Materials with Strong Second-Harmonic-Generation Responses, *Inorg. Chem.*, 2020, **59**, 18452-18460.
- S9. H. J. Zhao and L. J. Zhou, A Series of Noncentrosymmetric Antimony Sulfides  $\text{Ln}_8\text{Sb}_2\text{S}_{15}$  (Ln = La, Pr, Nd) – Syntheses, Crystal and Electronic Structures, and NLO Properties, *Eur. J. Inorg. Chem.*, 2015, **2015**, 964-968.
- S10. Y.-F. Shi, Y.-k. Chen, M.-C. Chen, L.-M. Wu, H. Lin, L.-J. Zhou and L. Chen, Strongest Second Harmonic Generation in the Polar  $\text{R}_3\text{MTQ}_7$  Family: Atomic Distribution Induced Nonlinear Optical Cooperation, *Chem. Mater.*, 2015, **27**, 1876-1884.
- S11. Q. G. Yue, S. H. Zhou, B. Li, X. T. Wu, H. Lin and Q. L. Zhu, Quaternary Noncentrosymmetric Rare-Earth Sulfides  $\text{Ba}_4\text{RE}_2\text{Cd}_3\text{S}_{10}$  (RE = Sm, Gd, or Tb): A Joint Experimental and Theoretical Investigation, *Inorg. Chem.*, 2022, **61**, 1797-1804.
- S12. J. Xu, K. Wu, Y. Xiao, B. Zhang, H. Yu and H. Zhang, Mixed-Anion-Oriented Design of  $\text{LnMGa}_3\text{S}_6\text{O}$  (Ln = La, Pr, and Nd; M = Ca and Sr) Nonlinear Optical Oxysulfides with Targeted Property Balance, *ACS Appl. Mater. Inter.*, 2022, **14**, 37967-37974
- S13. W. Xing, N. Wang, Y. Guo, Z. Li, J. Tang, K. Kang, W. Yin, Z. Lin, J. Yao and B. Kang, Two rare-earth-based quaternary chalcogenides  $\text{EuCdGeQ}_4$  (Q = S, Se) with strong second-harmonic generation, *Dalton Trans.*, 2019, **48**, 17620-17625.
- S14. M.-C. Chen, L.-H. Li, Y.-B. Chen and L. Chen, In-phase alignments of asymmetric building units in  $\text{Ln}_4\text{GaSbS}_9$  (Ln = Pr, Nd, Sm, Gd– Ho) and their strong nonlinear optical responses in middle IR, *J. Am. Chem. Soc.*, 2011, **133**, 4617-4624.

- S15. M. Usman, M. D. Smith, G. Morrison, V. V. Klepov, W. Zhang, P. S. Halasyamani and H. C. Zur Loye, Molten Alkali Halide Flux Growth of an Extensive Family of Noncentrosymmetric Rare Earth Sulfides: Structure and Magnetic and Optical (SHG) Properties, *Inorg. Chem.*, 2019, **58**, 8541-8550.
